## Correction: Acute myeloid leukemia with t(4;12)(q12;p13): an aggressive disease with frequent involvement of PDGFRA and ETV6

Jingyi Li<sup>1,2,\*</sup>, Jie Xu<sup>1,\*</sup>, Lynne V. Abruzzo<sup>1,3</sup>, Guilin Tang<sup>1</sup>, Shaoying Li<sup>1</sup>, M. James You<sup>1</sup>, Gary Lu<sup>1,4</sup>, Elias J. Jabbour<sup>5</sup>, Qi Deng<sup>2</sup>, Carlos E. Bueso-Ramos<sup>1</sup>, L. Jeffrey Medeiros<sup>1</sup> and C. Cameron Yin<sup>1</sup>

<sup>1</sup> Department of Hematopathology, The University of Texas MD Anderson Cancer Center, Houston, TX, USA

<sup>2</sup> Department of Hematology, Tianjin First Center Hospital, Tianjin, China

<sup>3</sup> Current address: Department of Pathology, The Ohio State University, College of Medicine, Columbus, OH, USA

<sup>4</sup> Current address: Department of Biomedical Sciences, University of South Carolina School of Medicine, Greenville, SC, USA

<sup>5</sup> Department of Leukemia, The University of Texas MD Anderson Cancer Center, Houston, TX, USA

\* These authors contributed equally to this work

**Published:** September 28, 2018

**Copyright:** Li et al. This is an open-access article distributed under the terms of the Creative Commons Attribution License 3.0 (CC BY 3.0), which permits unrestricted use, distribution, and reproduction in any medium, provided the original author and source are credited.

**This article has been corrected:** The correct author affiliation is given below:

<sup>1</sup> Department of Hematopathology, The University of Texas MD Anderson Cancer Center, Houston, TX, USA

Original article: Oncotarget. 2018; 9:10987-10994. <https://doi.org/10.18632/oncotarget.23743>
